# Supplementary material
Source: PubMed Central journal article supplement (PMC5828454)
Supplement: DB170745SupplementaryData.pdf [file DB170745SupplementaryData.pdf]

## SUPPLEMENTARY DATA

**$\beta$ -gal staining.** Day 1 pups were sacrificed, sliced in two halves along the middle line and fixed in 10% neutrally buffered formalin overnight. Rinse pups three times in detergent buffer (0.1M phosphate buffer, pH7.3, 0.02% Nonidet P40, 0.01% sodium deoxycholate, 5mM EGTA and 2mM MgCl<sub>2</sub>) and stain pups in staining buffer (0.1M phosphate buffer, pH7.3, 0.02% Nonidet P40, 0.01% sodium deoxycholate, 5mM potassium ferricyanide, 5mM potassium ferrocyanide, 20mM Tris.Cl, pH7.3, 1mg/ml X-gal) at 37°C till color fully develops. Then rinse pups and store in 70% ethanol.

**Study population.** WHI is a longitudinal national health study that investigates strategies to prevent cardiovascular disease, cancer, diabetes, and fractures in postmenopausal women. Details on the design and enrollment of the WHI are published elsewhere(1). The WHI SNP Health Association Resource (SHARe) included 8,515 AA and 3,642 HA participants aged 50–79 years old who participated in the WHI clinical trials or observational study and for whom genome-wide association study genotyping was conducted and who provided supplemental consent that allowed for data sharing. After excluding the participants with missing genetic data, a total of 8,298 AA and 3,526 HA women were involved in this study. Genome-wide genotyping of the WHI-SHARe participants was performed using the Affymetrix 6.0 array (Affymetrix, Inc, Santa Clara, CA). The genotype data were imputed using MACH with reference panels from the 1000 Genomes (1000G) Project Consortium (Version 3, March 2012 release), which provide near complete coverage of common and low-frequency genetic variation with minor allele frequency  $\geq 0.5\%$ .

Obesity cases were those participants who had BMI  $\geq 30$  kg/m<sup>2</sup> at baseline. Prevalent diabetes cases were identified from self-report of diabetes treatment. Incident diabetes was identified as first-time use of glucose lowering medication (insulin or oral glycemic control agents) or hospitalization for previously unreported diabetes(1).

**Quality Control Procedures for imputed SNPs.** The imputed SNPs in WHI were filtered out when minor allele frequencies (MAF) $< 0.05$  or the squared correlations ( $R^2$ ) between original genotypes and imputed dosages  $< 0.3$ . SNPs within the genomic region of SNRK (i.e., -30 kb upstream to +30 kb downstream) were further filtered out if linkage disequilibrium (LD)  $R^2 > 0.8$ . Finally, 86 SNPs in AA and 68 SNPs in HA women were included in the statistical analysis.

**Human Population Statistical Analysis.** We used linear model to calculate beta coefficients and 95% confidence intervals (CIs) for single SNP associations with BMI and waist circumference, and logistic regression to calculate odds ratios (ORs) and 95% CIs for single SNP associations with risk of obesity and diabetes. Multivariable models were adjusted for age, geographic region, and four principal components of global ancestry. All models were run separately in AA and HA women. To account for potential false positives because of the multiple comparisons in this study, we calculated the false discovery rate (FDR) by incorporating all  $P$  values from multiple tests. FDR is defined as the expected proportion of false positives among all significant results. The FDR statistics were obtained for each  $P$  value, and the FDR statistics with  $q \leq 0.05$  were considered significant (2). All statistical analyses were conducted with R version 3.2.3 (3). LocusTrack (4) were used for regional visualization of the SNPs association with BMI, waist, and risk of obesity in AA and HA women.

SUPPLEMENTARY DATA

**References**

1. The Women's Health Initiative Study Group. Design of the Women's Health Initiative clinical trial and observational study. *Control Clin Trials* 1998;19:61-109
2. Benjamini Y, Hochberg Y. Controlling the false discovery rate: a practical and powerful approach to multiple testing. *Journal of the royal statistical society Series B (Methodological)* 1995:289-300
3. R Core Team. R: A language and environment for statistical computing. R Foundation for Statistical Computing, Vienna, Austria Available: <http://www.r-project.org/> 2014;
4. Cuellar-Partida G, Renteria ME, MacGregor S. LocusTrack: Integrated visualization of GWAS results and genomic annotation. *Source Code Biol Med* 2015;10:1

**Supplementary Figure 1. Effect of glucose level on SNRK gene expression. \* $P < 0.05$**

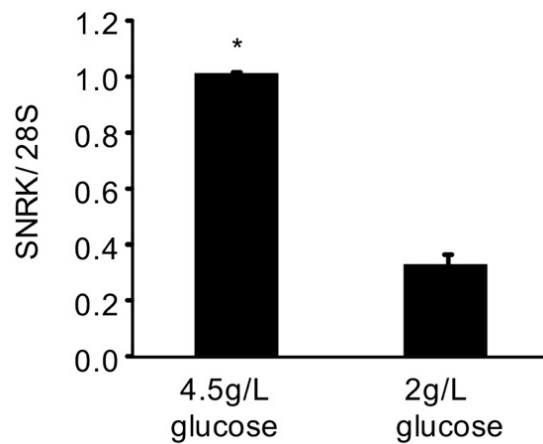

SUPPLEMENTARY DATA

**Supplementary Figure 2. Design of SNRK targeting construct.**

SA, splice acceptor; LacZ,  $\beta$ -galactosidase gene; Neo, neomycin resistance gene; pA, polyadenylation signal; Neo, neomycin; FRT, Flp recombinase recognition target; loxP, Cre recombinase recognition site; 4, exon 4; 5, exon 5; DTA, diphtheria toxin gene.

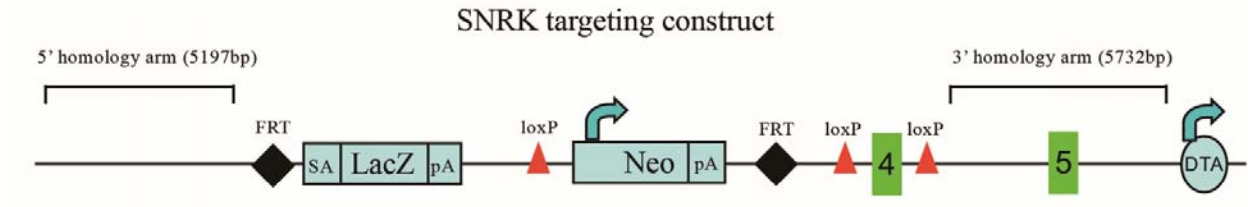

**Supplementary Figure 3. SNRK deficient pups.**

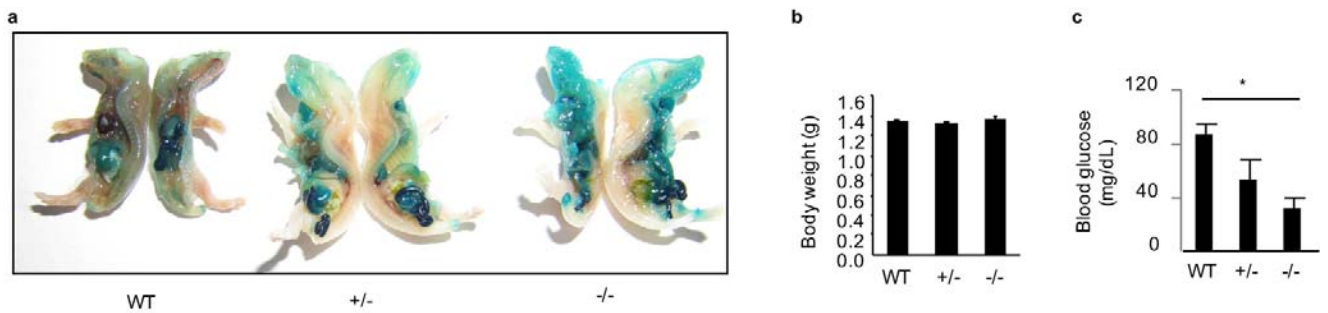

SUPPLEMENTARY DATA

**Supplementary Figure 4. Characterization of SNRK heterozygous mice on a chow diet.**

(a) Growth curve of WT and SNRK<sup>+/-</sup> male mice on a chow diet (n=6-8 per group). (b) Weights of epididymal (Epi) and subcutaneous (SubQ) white adipose tissue (WAT) of WT and SNRK<sup>+/-</sup> mice (n=6-8 per group). (c) Triglyceride (TAG) contents in Epi and SubQ WAT of WT and SNRK<sup>+/-</sup> mice (n=6-8 per group). (d) Gene expression in SubQ WAT of WT and SNRK<sup>+/-</sup> mice (n=6-8 per group). (e) HE staining of subcutaneous WAT from WT and SNRK<sup>+/-</sup> male mice fed on a chow diet. \* *P*<0.05 as indicated.

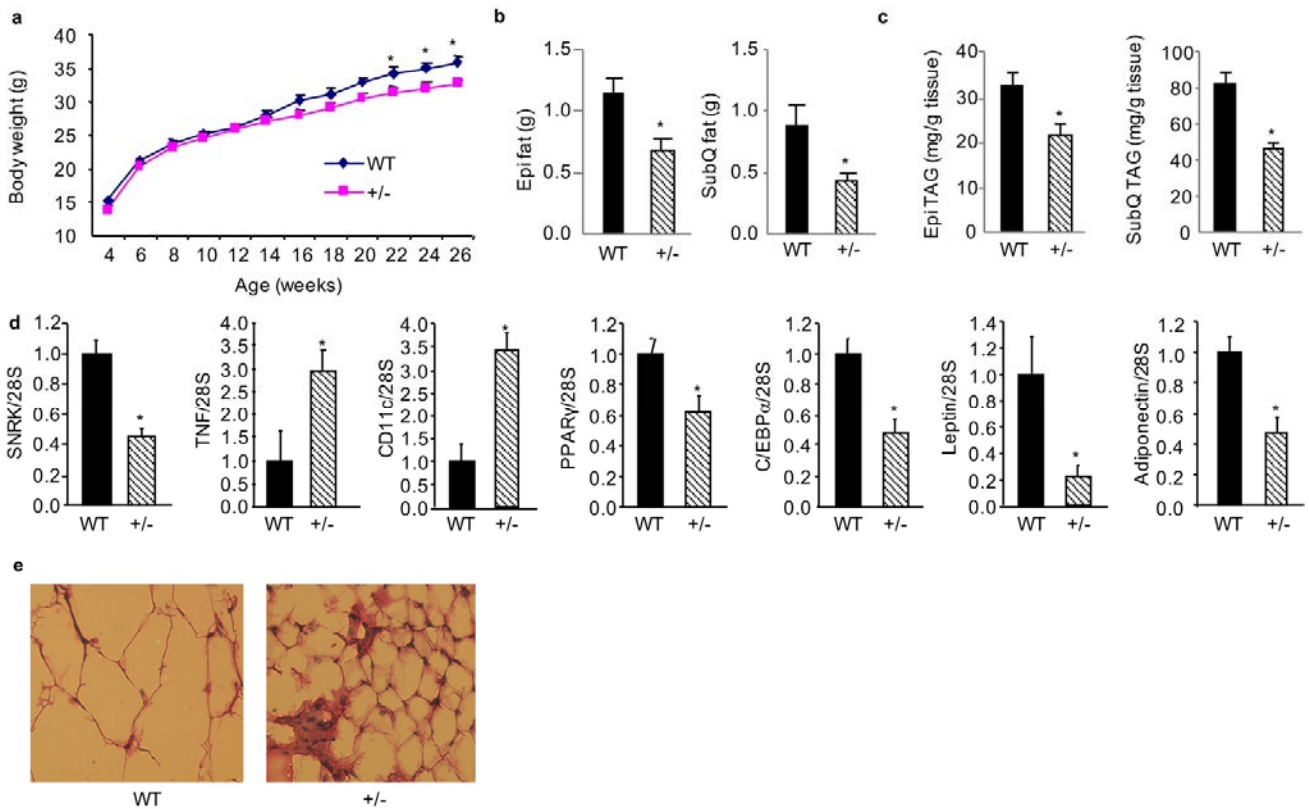

SUPPLEMENTARY DATA

**Supplementary Figure 5. Characterization of SNRK heterozygous mice on a high fat diet.**

(a) Growth curve of WT and SNRK<sup>+/-</sup> male mice on a high fat diet (HFD) (n=6-7 per group). (b) Weights of epididymal (Epi) and subcutaneous (SubQ) white adipose tissue of WT and SNRK<sup>+/-</sup> male mice on a HFD (n=6-7 per group). (c) Blood glucose levels of WT and SNRK<sup>+/-</sup> male mice on a HFD (n=6-7 per group). \* *P*<0.05 as indicated.

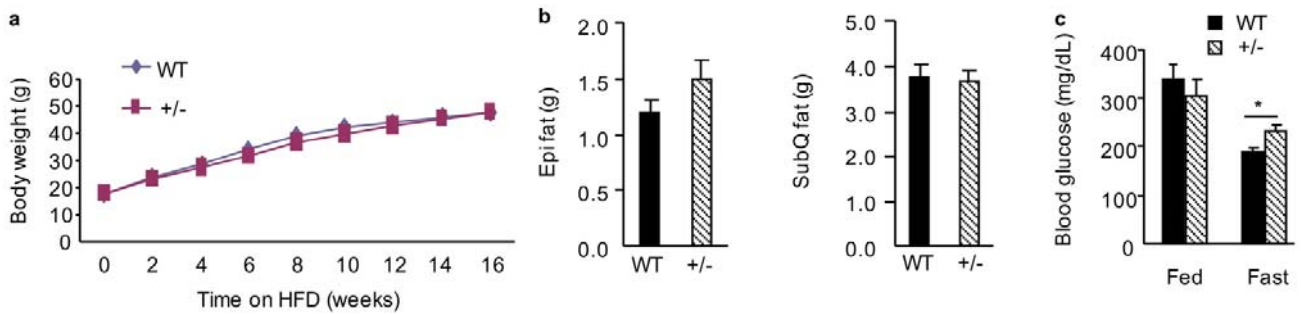

**Supplementary Figure 6. Effect of SNRK heterozygosity on brown adipose tissue (BAT).**

(a) SNRK gene expression in BAT and weights of BAT from WT and SNRK<sup>+/-</sup> male mice fed on a chow diet (n=6-8 per group). (b) HE staining of BAT from WT and SNRK<sup>+/-</sup> male mice fed on a chow diet. (c) Oil red O staining of BAT from WT and SNRK<sup>+/-</sup> male mice fed on a chow diet. \* *P*<0.05 as indicated.

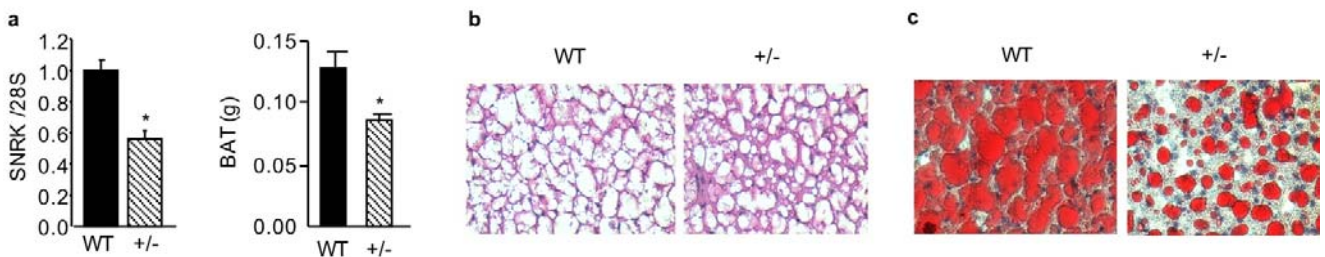

SUPPLEMENTARY DATA

**Supplementary Figure 7. Regional association of the SNRK SNPs with BMI, waist circumference, and risk of obesity in African American (AA) and Hispanic American (HA) women**

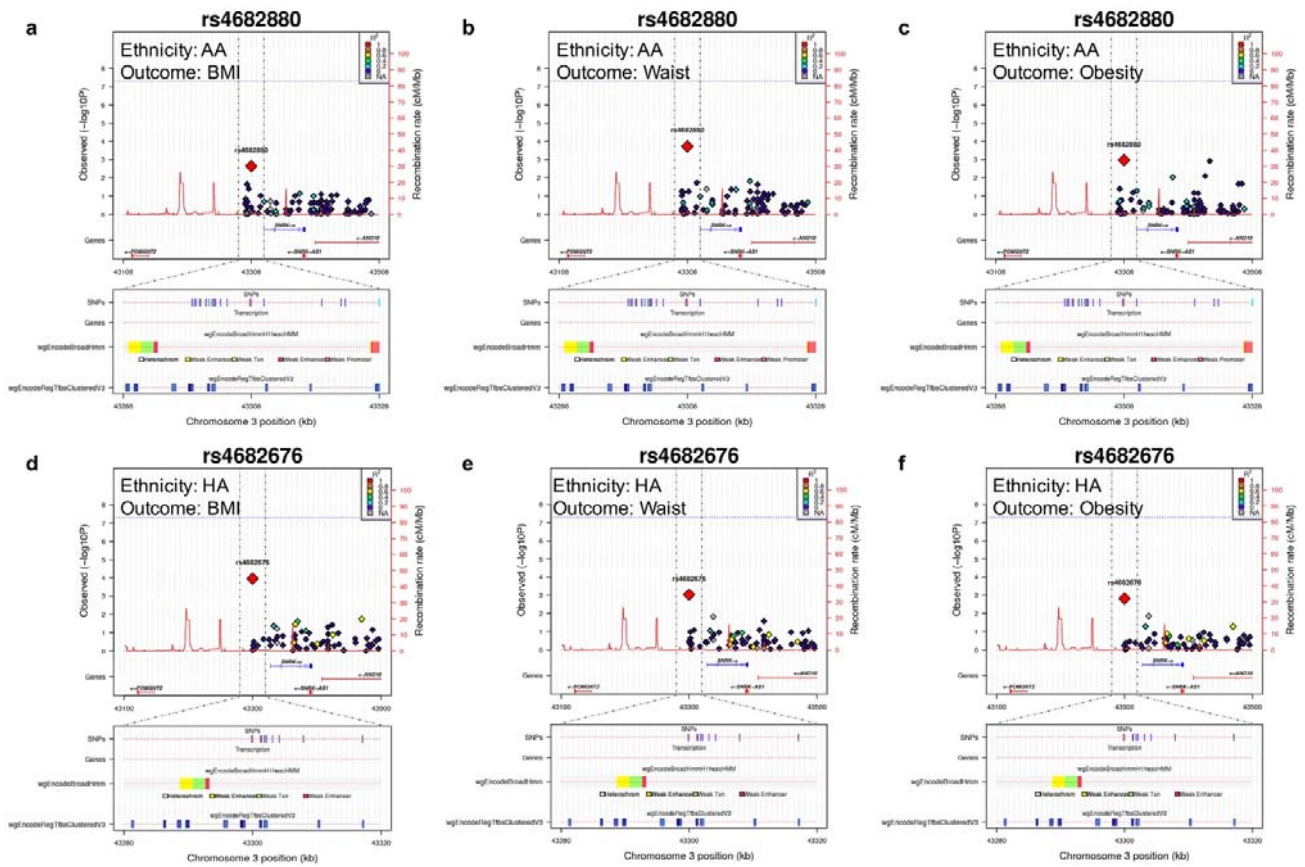

SUPPLEMENTARY DATA

**Supplementary Table 1. Phosphoproteins that have significantly increased phosphorylation level by 50% and more upon SNRK overexpression.**

| Symbol                              | Name                                             | Phosphorylation sites | SNRK/GFP ratio | Q Value for SILAC |
|-------------------------------------|--------------------------------------------------|-----------------------|----------------|-------------------|
| <b>Signal transduction</b>          |                                                  |                       |                |                   |
| SNRK                                | SNF-related serine/threonine-protein kinase      | S162                  | 16.86          | 0.03              |
| SNRK                                | SNF-related serine/threonine-protein kinase      | S390                  | 11.02          | 0.02              |
| ARHGAP17                            | Rho GTPase-activating protein 17                 | T730T734T736S739      | 7.98           | 0.03              |
| RRAS2                               | Ras-related protein R-Ras2                       | S186                  | 6.97           | 0.04              |
| AHNAK                               | Ahnak AHNAK nucleoprotein isoform 1              | S116                  | 4.92           | 0.02              |
| <b>Transcription</b>                |                                                  |                       |                |                   |
| Hmg1                                | MCG120563, isoform CRA_a                         | S91                   | 34.55          | 0.02              |
| XRN2                                | 5'-3' exoribonuclease 2                          | S448                  | 4.85           | 0.03              |
| <b>HDAC1</b>                        | <b>Histone deacetylase 1</b>                     | <b>S393</b>           | <b>1.72</b>    | 0.03              |
| <b>Messenger RNA processing</b>     |                                                  |                       |                |                   |
| HNRPLL                              | Heterogeneous nuclear ribonucleoprotein L-like   | S37                   | 21.18          | 0.02              |
| HNRNPC                              | Heterogeneous nuclear ribonucleoproteins C1/C2   | S268                  | 7.02           | 0.04              |
| <b>Translation</b>                  |                                                  |                       |                |                   |
| <b>EEF1D</b>                        | <b>Eef1d protein</b>                             | <b>S133</b>           | <b>2.52</b>    | 0.01              |
| EEF1D                               | Eef1d protein                                    | S162                  | 1.87           | 0.04              |
| <b>Glucose and lipid metabolism</b> |                                                  |                       |                |                   |
| PDHA1                               | Pyruvate dehydrogenase E1 alpha 1                | S293S300              | 5.57           | 0.03              |
| <b>Transport</b>                    |                                                  |                       |                |                   |
| MORC2                               | MORC family CW-type zinc finger protein 2A       | S741                  | 7.85           | 0.04              |
| OSBP                                | Oxysterol-binding protein                        | S303                  | 2.27           | 0.03              |
| <b>Cytoskeleton</b>                 |                                                  |                       |                |                   |
| ITGB1                               | Integrin beta                                    | S1070                 | 153.90         | 0.03              |
| CGN                                 | Cingulin                                         | S131                  | 1.88           | 0.04              |
| <b>Cell Cycle</b>                   |                                                  |                       |                |                   |
| CCNE2                               | Cyclin E2                                        | S20                   | 7.24           | 0.01              |
| PDS5B                               | Sister chromatid cohesion protein PDS5 homolog B | S1281                 | 6.46           | 0.02              |
| CEP55                               | Centrosomal protein of 55 kDa                    | S428                  | 2.18           | 0.01              |
| <b>Iron-sulfur cluster assembly</b> |                                                  |                       |                |                   |
| NUCB1                               | Nucleobindin-1                                   | S368                  | 7.80           | 0.02              |
| <b>Miscellaneous</b>                |                                                  |                       |                |                   |
| KRI1                                | Protein KRI1 homolog                             | S183S184S188          | 3.11           | 0.02              |
| SHROOM2                             | SHROOM2                                          | S236                  | 1.76           | 0.05              |

SUPPLEMENTARY DATA

**Supplementary Table 2. Baseline characteristics of African American and Hispanic American women in the WHI-SHARe**

|                                      | AA          | HA          |
|--------------------------------------|-------------|-------------|
| <i>n</i>                             | 8,298       | 3,526       |
| Age <sup>1</sup> , year              | 61.6 (7.0)  | 60.3 (6.7)  |
| BMI <sup>1</sup> , Kg/m <sup>2</sup> | 31.1 (6.6)  | 28.9 (5.8)  |
| Waist <sup>1</sup> , cm              | 91.6 (13.8) | 86.7 (12.8) |
| Obesity, %                           | 49.9        | 35.8        |
| Diabetes <sup>2</sup> , %            | 30.3        | 23.4        |

<sup>1</sup> Data are shown as mean (SD).

<sup>2</sup> Both prevalent and incident cases were included.



SUPPLEMENTARY DATA

**Supplementary Table 3. Top 5 associations of common variants in *SNRK* gene with BMI, waist, and risks of obesity and diabetes in African American (AA, *n*=8,298) and Hispanic American (HA, *n*=3,526) women in the WHI-SHARe**

| Ethnicity | Outcomes | dbSNP ID    | Allele <sup>1</sup> | MAF  | beta/OR (95% CI) <sup>2</sup> | <i>P</i> value | <i>q</i> value |
|-----------|----------|-------------|---------------------|------|-------------------------------|----------------|----------------|
| AA        | BMI      | rs4682880   | T/C                 | 0.16 | 0.38 (0.14, 0.62)             | 0.002          | 0.19           |
|           |          | rs4682677   | C/A                 | 0.06 | -0.53 (-0.98, -0.07)          | 0.02           | 0.76           |
|           |          | rs9845574   | T/G                 | 0.38 | -0.25 (-0.48, -0.01)          | 0.04           | 0.76           |
|           |          | rs17075583  | T/C                 | 0.10 | 0.28 (-0.02, 0.58)            | 0.07           | 0.76           |
|           |          | rs1848069   | T/C                 | 0.13 | 0.24 (-0.03, 0.50)            | 0.08           | 0.76           |
|           | Waist    | rs4682880   | T/C                 | 0.16 | 0.98 (0.46, 1.49)             | <0.001         | 0.01           |
|           |          | rs73831272  | C/T                 | 0.22 | 0.58 (0.11, 1.05)             | 0.02           | 0.35           |
|           |          | rs72863618  | G/A                 | 0.11 | 0.72 (0.12, 1.32)             | 0.02           | 0.35           |
|           |          | rs1848069   | T/C                 | 0.13 | 0.64 (0.09, 1.20)             | 0.02           | 0.35           |
|           |          | rs190271078 | A/G                 | 0.11 | 0.67 (0.03, 1.30)             | 0.04           | 0.35           |
|           | Obesity  | rs4682880   | T/C                 | 0.16 | 1.13 (1.05, 1.22)             | 0.001          | 0.05           |
|           |          | rs62250912  | G/T                 | 0.06 | 0.75 (0.63, 0.89)             | 0.001          | 0.05           |
|           |          | rs34557672  | C/A                 | 0.09 | 0.82 (0.71, 0.95)             | 0.01           | 0.19           |
|           |          | rs17075583  | T/C                 | 0.10 | 1.13 (1.03, 1.24)             | 0.01           | 0.19           |
|           |          | rs9881028   | T/C                 | 0.37 | 1.09 (1.01, 1.17)             | 0.02           | 0.29           |
|           | Diabetes | rs9817430   | A/G                 | 0.34 | 1.10 (1.01, 1.19)             | 0.02           | 0.89           |
|           |          | rs56412846  | G/A                 | 0.10 | 0.90 (0.81, 1.00)             | 0.05           | 0.89           |
|           |          | rs4234429   | T/C                 | 0.06 | 1.13 (0.99, 1.30)             | 0.06           | 0.89           |
|           |          | rs9844641   | T/C                 | 0.07 | 0.91 (0.81, 1.02)             | 0.09           | 0.89           |
|           |          | rs4682676   | G/A                 | 0.07 | 1.10 (0.98, 1.24)             | 0.10           | 0.89           |
| HA        | BMI      | rs4682676   | G/A                 | 0.07 | -2.81 (-4.24, -1.39)          | <0.001         | 0.004          |
|           |          | rs4234429   | T/C                 | 0.06 | -1.72 (-3.15, -0.29)          | 0.02           | 0.27           |
|           |          | rs4682881   | C/A                 | 0.07 | -1.69 (-3.15, -0.22)          | 0.02           | 0.27           |
|           |          | rs2372373   | T/G                 | 0.06 | -1.86 (-3.58, -0.14)          | 0.03           | 0.27           |
|           |          | rs34027772  | C/T                 | 0.05 | -0.85 (-1.65, -0.05)          | 0.04           | 0.27           |
|           | Waist    | rs4682676   | G/A                 | 0.07 | -5.31 (-8.45, -2.17)          | 0.001          | 0.02           |
|           |          | rs181229667 | A/G                 | 0.05 | -2.97 (-5.37, -0.57)          | 0.02           | 0.20           |
|           |          | rs9818582   | A/G                 | 0.27 | -0.83 (-1.57, -0.10)          | 0.03           | 0.23           |
|           |          | rs116896819 | C/A                 | 0.07 | 0.85 (-0.11, 1.80)            | 0.08           | 0.25           |
|           |          | rs4682880   | T/C                 | 0.16 | -1.63 (-3.48, 0.21)           | 0.08           | 0.25           |
|           | Obesity  | rs4682676   | G/A                 | 0.07 | 0.44 (0.26, 0.73)             | 0.002          | 0.07           |
|           |          | rs181229667 | A/G                 | 0.05 | 0.62 (0.42, 0.91)             | 0.01           | 0.31           |
|           |          | rs1395373   | C/T                 | 0.11 | 0.70 (0.49, 1.00)             | 0.05           | 0.53           |
|           |          | rs4234429   | T/C                 | 0.06 | 0.61 (0.37, 1.00)             | 0.05           | 0.53           |
|           |          | rs34027772  | C/T                 | 0.05 | 0.79 (0.60, 1.05)             | 0.11           | 0.53           |
|           | Diabetes | rs4682676   | G/A                 | 0.07 | 0.52 (0.31, 0.87)             | 0.01           | 0.79           |
|           |          | rs4396868   | A/G                 | 0.32 | 0.88 (0.76, 1.01)             | 0.06           | 0.83           |
|           |          | rs6793392   | G/C                 | 0.30 | 1.11 (0.99, 1.24)             | 0.06           | 0.83           |

## SUPPLEMENTARY DATA

---

|             |     |      |                   |      |      |
|-------------|-----|------|-------------------|------|------|
| rs4682880   | T/C | 0.16 | 0.75 (0.55, 1.03) | 0.08 | 0.83 |
| rs114398053 | A/G | 0.08 | 1.59 (0.95, 2.66) | 0.08 | 0.83 |

---

<sup>1</sup> Major (Reference)/Minor Allele.

<sup>2</sup> MAF, Minor allele frequency.

<sup>3</sup> The associations of SNPs with BMI and waist are shown as beta (95% CI). The associations of SNPs with risks of obesity and diabetes are shown as OR (95% CI).
